# Supplementary material for: Synthesis of a Bone-Targeted Bortezomib with In Vivo Anti-Myeloma Effects in Mice
Source: Pharmaceutics. 2018 Sep 10;10(3):154. doi: 10.3390/pharmaceutics10030154 (PMC6161102; doi:10.3390/pharmaceutics10030154)
Supplement: Supplementary file 1 [file pharmaceutics-10-00154-s001.pdf]

# Supplementary materials: Synthesis of a Bone-Targeted Bortezomib with In Vivo Anti-Myeloma Effects in Mice

Hua Wang, Lifeng Xiao, Jianguo Tao, Venkat Srinivasan, Brendan F. Boyce, Frank H. Ebetino, Babatunde O. Oyajobi, Robert K. Boeckman Jr. and Lianping Xing

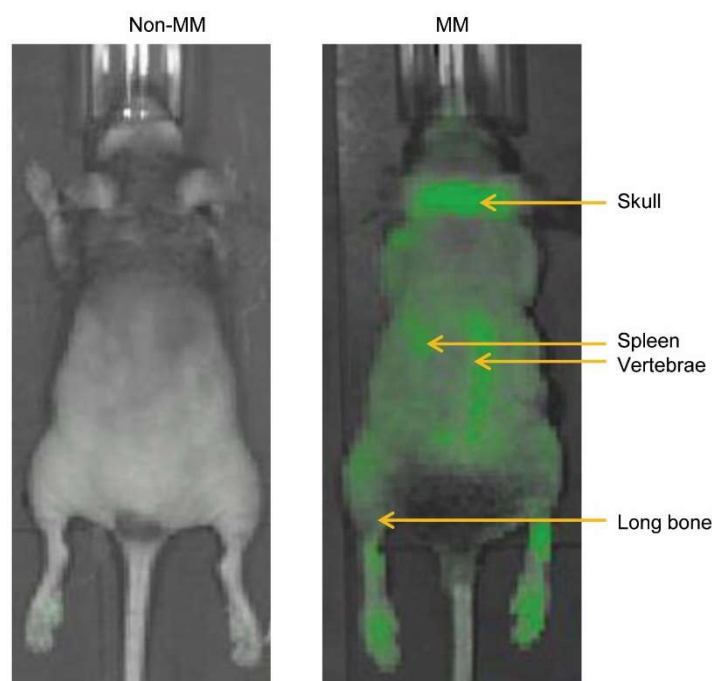

**Figure S1.** Mouse injected with 5TGM1-GFP cells via the tail vein and subjected to IVIS imaging at 3 weeks post-MM cell inoculation. The IVIS image from a MM mouse (**right**) showing GFP+ MM cells in skull, vertebrae, spleen and legs and from a mouse given no MM cells (**left**).

**Table S1.** Dosing information of BP-Btz in MM mice.

| Group     | n | Animals       | Drugs  | Dose (mg/kg) | Molar dose (μmol/kg) | Frequency | Total dose (μmol/kg) |
|-----------|---|---------------|--------|--------------|----------------------|-----------|----------------------|
| PBS+Veh   | 6 | PBS           | Saline | -            | -                    | Thrice/wk | -                    |
| MM+Veh    | 8 | Myeloma cells | Saline | -            | -                    | Thrice/wk | -                    |
| MM+Btz    | 8 | myeloma cells | Btz    | 0.6          | 1.56                 | Thrice/wk | 9.36                 |
| MM+BP-Btz | 8 | myeloma cells | BP-Btz | 1.2          | 1.68                 | Thrice/wk | 10.08                |
